# Supplementary material
Source: HighWire-hosted journal article supplement (https://jitc.bmj.com/content/10/5/e004329)

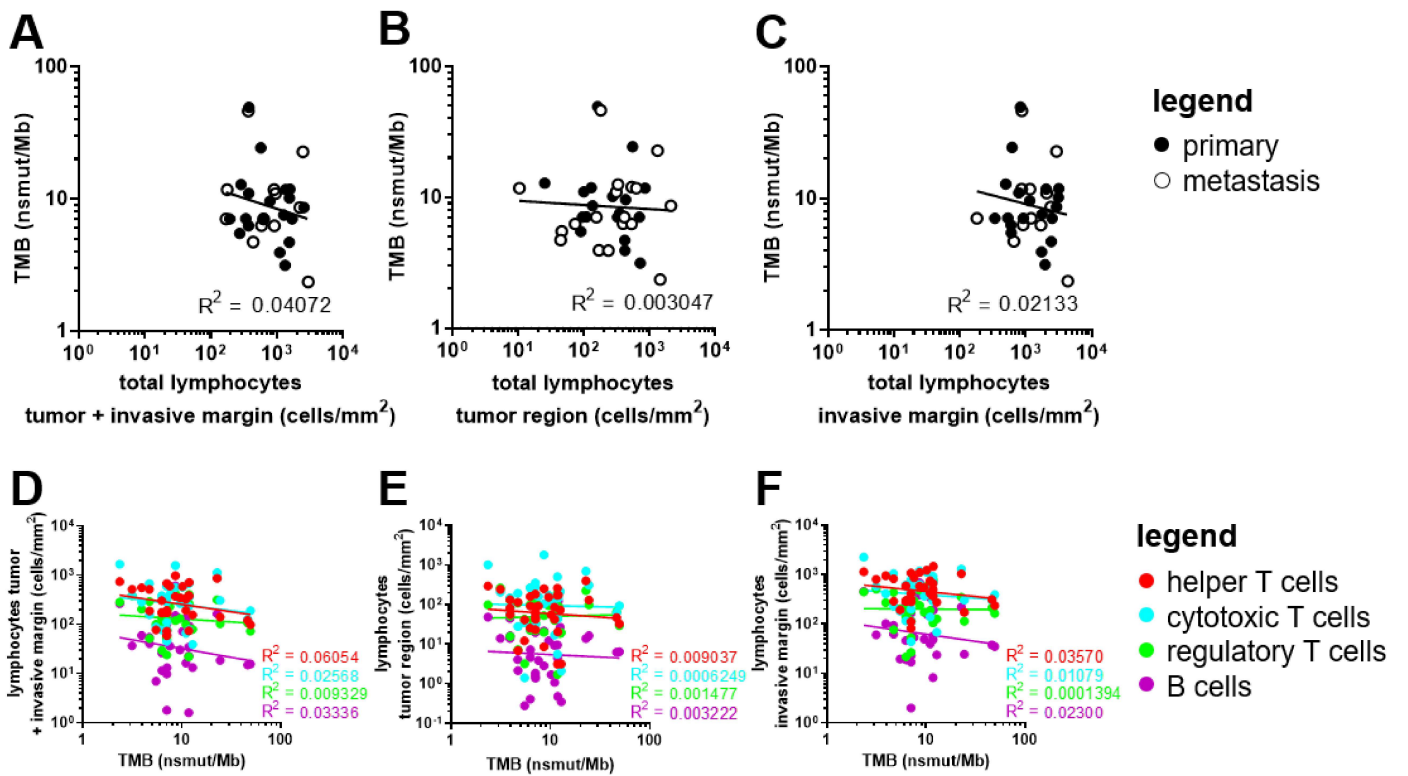

Supplement: inline-supplementary-material-7 [file inline-supplementary-material-7.pdf]
